# Supplementary material for: Metabolic Engineering of Escherichia coli for High-Level Production of (R)-Acetoin from Low-Cost Raw Materials
Source: MDPI journal article supplement (doi:10.3390/microorganisms11010203), 2023-01-13
Supplement: s1 [file s1]

**Supporting information for:**

**Metabolic engineering of *Escherichia coli* for high-level production of (R)-acetoin from non-food raw materials cassava**

Mengxue Diao <sup>1,§,\*</sup>, Jing Li <sup>2</sup>, Xianrui Chen <sup>1</sup>, Ya'nan Shi <sup>3</sup>, Bo Yu <sup>3</sup>, Jianxiu Li <sup>1</sup> and Nengzhong Xie <sup>1,\*</sup>

<sup>1</sup> State Key Laboratory of Non-food Biomass and Enzyme Technology, National Engineering Research Center for Non-food Biorefinery, Guangxi Biomass Engineering Technology Research Center, Guangxi Academy of Sciences, 98 Daling Road, Nanning 530007, China

<sup>2</sup> Life Science and Technology College, State Key Laboratory for Conservation and Utilization of Subtropical Agro-Bioresources, Guangxi University, Nanning 530004, China

<sup>3</sup> CAS Key Laboratory of Microbial Physiological & Metabolic Engineering, Institute of Microbiology, Chinese Academy of Sciences, Beijing 100101, China

\* Correspondence: mengxuediao@gxas.cn; xienengzhong@gxas.cn

§ These authors contributed equally to this work.

## Content

Figure S1. GC spectrum of fermentation broth containing (*R*)-acetoin and (*S*)-acetoin for calculating the optical purity. The peak area of (*R*)-acetoin ( $R_t=2.878$  min) was 420.60 and the peak area of (*S*)-acetoin ( $R_t=3.023$  min) was 14.20. (*R*)-AC, (*R*)-acetoin; (*S*)-AC, (*S*)-acetoin; SS-BD, (*S,S*)-2,3-butanediol; RR-BD, (*R,R*)-2,3-butanediol; meso-BD, meso-2,3-butanediol.

Table S1. Primers used in this study

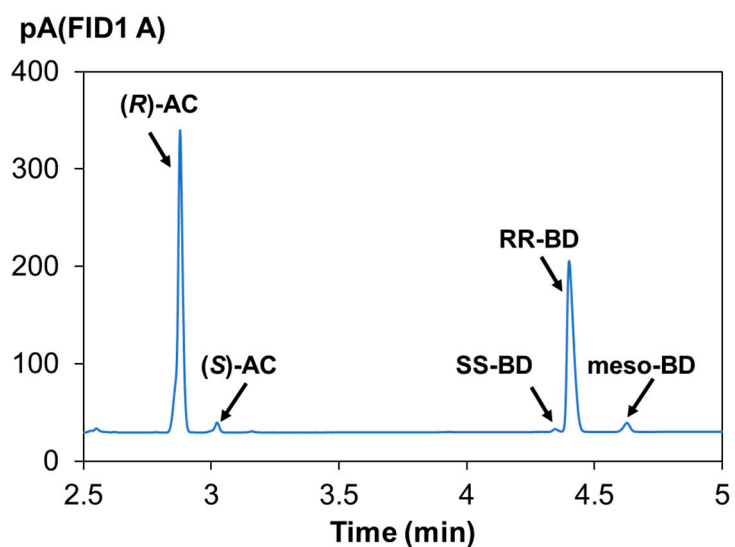

**Figure S1.** GC spectrum of fermentation broth containing (*R*)-acetoin and (*S*)-acetoin for calculating the optical purity. The peak area of (*R*)-acetoin ( $R_t=2.878$  min) was 420.60 and the peak area of (*S*)-acetoin ( $R_t=3.023$  min) was 15.25. (*R*)-AC, (*R*)-acetoin; (*S*)-AC, (*S*)-acetoin; SS-BD, (*S,S*)-2,3-butanediol; RR-BD, (*R,R*)-2,3-butanediol; meso-BD, meso-2,3-butanediol.

**Table S1.** Primers used in this study.

| Primer                   | Sequence 5' – 3'                                        | Application                                                        |
|--------------------------|---------------------------------------------------------|--------------------------------------------------------------------|
| fabD-F                   | ATTTCACACAGGAAACAGACCATGGAAATGA<br>CGCAATTTGCATTTGTG    | Overexpression of <i>fabD</i><br>in pTrc99A                        |
| fabD-R                   | CTCTCATCCGCCAAAACAGCCAAGCTTTTAA<br>AGCTCGAGCGCCGCTGC    |                                                                    |
| Cti-F                    | ATTTCACACAGGAAACAGACCATGGAAATGT<br>TGCCAAGACCGTTGGTTG   | Overexpression of <i>Cti</i> in<br>pTrc99A                         |
| Cti-R                    | CTCTCATCCGCCAAAACAGCCAAGCTTTCAG<br>AGGTTCTCGTAGCGGTTCA  |                                                                    |
| pTarget-yibT-F           | ACTAGTCCCCGTAACGCGATTCCGTCGTTTAA<br>GAGCTAGAAATAGCAAG   | Chromosomally gene<br>deletion of <i>yibT</i>                      |
| pTarget-yibT-R           | TAAAACGACGGAATCGCGTTACGGGGACTAG<br>TATTATACCTAGGACTG    |                                                                    |
| yibT-up-F                | GAATGGCATCTTCATCAGCTTC                                  |                                                                    |
| yibT-up-R                | CCTTTCAAAGTAAGCAACGTCTGCGATGAT<br>ATCTCCGTATTACCCCG     |                                                                    |
| yibT-down-F              | GCAGACGTTGCTTACTTTTGAAAGG                               |                                                                    |
| yibT-down-R              | GAGCGTCTGAATGCTGGCAAAAC                                 |                                                                    |
| pTarget-yghW-F           | ACTAGTGAGATCGCCAGCTTAGCGCCGTTTT<br>AGAGCTAGAAATAGCAAG   | Chromosomally gene<br>deletion of <i>yghW</i>                      |
| pTarget-yghW-R           | TAAAACGGCGCTAAGCTGGCGATCTCACTAG<br>TATTATACCTAGGACTG    |                                                                    |
| yghW-up-F                | TATGCAACGCTATCCGCAAGCG                                  |                                                                    |
| yghW-up-R                | GCAAGATAATACGTATGTTTGACGTTACCTC<br>ATTCGCTATATATTG      |                                                                    |
| yghW-down-F              | TCAAACATACGTATTATCTTGC                                  |                                                                    |
| yghW-down-R              | GTTATGTTTGTTCTCTTCGACCTG                                |                                                                    |
| yibT:: <i>fabD</i> -up-F | GCACCGAGTCGGTGCTTTTTTTGAATTCGATG<br>ATATCTCCGTATTACCCCG | Chromosomally gene<br>replacement of <i>yibT</i> by<br><i>fabD</i> |
| yibT:: <i>fabD</i> -up-R | GAGCCGGATGATTAATTGTCAAGAATGGCAT                         |                                                                    |

---

|                                    |                                                           |
|------------------------------------|-----------------------------------------------------------|
|                                    | CTTCATCAGCTTC                                             |
| <i>yibT</i> :: <i>fabD</i> -F      | GAAGCTGATGAAGATGCCATTCTTGACAATT<br>AATCATCCGGCTC          |
| <i>yibT</i> :: <i>fabD</i> -R      | GTTTTGCCAGCATTGACGCTCATTGTCCT<br>ACTCAGGAGAGCG            |
| <i>yibT</i> :: <i>fabD</i> -down-F | CGCTCTCCTGAGTAGGACAAATGAGCGTCTG<br>AATGCTGGCAAAC          |
| <i>yibT</i> :: <i>fabD</i> -down-R | GGGATAACAGGGTAATAGATCTAAGCTTGCA<br>GACGTTGCTTACTTTTGAAAGG |
| <i>N20</i> -F                      | ATAATACTAGTACGGCTTTATCGATAAGAAGG<br>TTTAGAGCTAGAAATAGC    |
| <i>N20</i> -R                      | GCTATTTCTAGCTCTAAACCTTCTTATCGATA<br>AAGCCGTACTAGTATTATA   |
| pTarget-F                          | GTTTTAGAGCTAGAAATAGCAAGTTA                                |
| pTarget-R                          | ACTAGTATTATACCTAGGACTGAGCT                                |
| <i>tsf</i> -F                      | CTTTCAAAAGTAAGCAACGTCTGCTTACGCA<br>GATCACATCTCCGAGGATT    |
| <i>tsf</i> -R                      | CCGCGCATTCCCGGCGGGGTAATACGGAG<br>ATATCATCATGGCCTCAGG      |
| <i>yibt</i> (up)-F                 | TGCAGGCAACAATGGAACAA                                      |
| <i>yibt</i> (up)-R                 | CGCAGCTCTTTTACCAGGGATGCGGTAATTTC<br>AGCCATGTAAGCAGACGT    |
| <i>yibt</i> (down)-F               | GATGTCCAAGCAGTCTTAATTATCAAACCATG<br>ATGATATCTCCGTATTACC   |
| <i>yibt</i> (down)-R               | GTAATTGCGCGCTGGAATG                                       |
| sanpianduancexu-F                  | AACTGAGTGCTGGCGAC                                         |
| sanpianduancexu-R                  | GGCAATCCTCATCAGAGAATTGC                                   |

---
